## Main Manuscript for

# Prenatal environmental variation, alternative reproductive tactics and the formation of a mixed-kin cooperative society

Shailee S. Shah<sup>1\*</sup> and Dustin R. Rubenstein<sup>1,2</sup>

<sup>1</sup>Department of Ecology, Evolution, and Environmental Biology, Columbia University, 1200 Amsterdam Avenue, New York, NY 10027 USA

<sup>2</sup>Center for Integrative Animal Behavior, Columbia University, New York, NY 10027 USA

\*Correspondence to: Shailee S. Shah

**Email:** [shailee.shah@columbia.edu](mailto:shailee.shah@columbia.edu)

**Author contributions:** Both authors designed the study, collected and analyzed the data, and wrote the paper.

**Competing Interest Statement:** The authors declare no competing interests.

**Keywords:** alternative reproductive tactics; dispersal; inclusive fitness; cooperative breeding; mixed-kin society; direct benefits

**This PDF file includes:**

Abstract

Main Text

Figures 1 to 4

Tables 1 to 3

## 1 **Abstract**

2 Although animal societies often evolve due to limited natal dispersal that results in kin clustering  
3 and facilitates cooperation among relatives, many species form cooperative groups with low and  
4 variable kin structure. To understand how such mixed-kin societies form despite their potential  
5 for social conflict, we investigated the environmental causes and subsequent fitness  
6 consequences of dispersal decisions in male cooperatively breeding superb starlings  
7 (*Lamprotornis superbus*) living in a climatically unpredictable environment. We show that the  
8 two alternative reproductive tactics—natal dispersal vs. philopatry—exhibit reproductive  
9 tradeoffs resulting in equal lifetime inclusive fitness. The tactic an individual adopts is governed  
10 by the environment its parents experience prior to laying rather than the environment it  
11 experiences as an adolescent. When individuals adopt the tactic not predicted by early life  
12 environmental conditions, their fitness is reduced. Ultimately, climate-driven oscillating  
13 selection may help stabilize mixed-kin animal societies by influencing alternative reproductive  
14 trajectories early in life.

15

## 16 **Main Text**

### 17 **Introduction**

18 Dispersal decisions that enable individuals to escape unfavorable environmental conditions or  
19 reduce inbreeding risk also influence ecological and evolutionary processes like range expansion,  
20 gene flow, and the formation of animal societies (Matthysen, 2012; Taylor, 1992). Limited natal  
21 dispersal—the permanent movement of an individual from its natal to breeding site—plays a  
22 crucial role in social evolution by creating spatial clustering of kin that facilitates cooperative  
23 care of young by relatives (Emlen, 1994; Hamilton, 1964a, 1964b). Although most animal

24 societies are therefore characterized by groups with high kin structure, a surprising number of  
25 species form social groups with low kin structure (Riehl, 2013) that consist of same-sex residents  
26 and immigrants, which often compete for breeding opportunities (Baglione et al., 2002; Davidian  
27 et al., 2016; Kaiser et al., 2018; Reyer, 1980). Since kin selection alone cannot explain the  
28 evolution of these mixed-kin societies (Liu et al., 2015; Riehl and Jara, 2009; Rubenstein and  
29 Abbot, 2017), direct reproductive or survival benefits may underlie their formation (Baglione et  
30 al., 2002; Clutton-Brock, 2002; Kaiser et al., 2018). Understanding how mixed-kin cooperative  
31 societies form and remain stable despite their reduced kin structure and potential for high social  
32 conflict will require examining the causes and lifetime fitness consequences of individual  
33 dispersal decisions to determine why some individuals choose to remain in their natal groups  
34 with kin while others do not.

35  
36 Dispersal decisions are influenced not only by aspects of the social or ecological environment  
37 that individuals experience after birth (termed postnatal factors) (Baglione et al., 2006; Eikenaar  
38 et al., 2010; Nelson-Flower et al., 2018), but also by how these factors impact their development  
39 early-in-life or affect their parents prior to birth (termed prenatal factors) (Duckworth, 2009;  
40 Tschirren et al., 2007). The influence of prenatal factors typically manifests via parental effects,  
41 modifications provided by the mother or father to the offspring during development that alter  
42 offspring phenotype (Mousseau and Fox, 1998). Parental effects may be particularly important in  
43 cooperatively breeding species (Russell and Lummaa, 2009), where parents can limit offspring  
44 dispersal by influencing helping behavior or promote dispersal to reduce kin competition  
45 (Dantzer et al., 2019; Duckworth, 2009; Silk and Brown, 2008). Although dispersal in most  
46 social species tends to be sex-biased (Greenwood and Harvey, 1982), in many cooperative

47 breeders, individuals of one sex can adopt either of two alternative reproductive tactics: natal  
48 dispersal or philopatry (Davidian et al., 2016; Nelson-Flower et al., 2018). Such sex-specific  
49 behavioral polymorphisms can exist either because (i) individuals face conditional constraints in  
50 adopting the tactic with higher fitness and must instead make “the-best-of-a-bad-job” by  
51 choosing the tactic with lower fitness (Dawkins, 1980; Koprowski, 1993), or (ii) the relative  
52 fitness payoffs are environmentally-dependent such that both tactics can persist within a  
53 population when conditions fluctuate from year-to-year (Moran, 1992; West Eberhard, 1989).  
54 Consistent with the “best-of-a-bad-job” hypothesis, the fitness benefits of alternative  
55 reproductive tactics in cooperative breeders tend to be unequal in the short-term (Bergmüller et  
56 al., 2005; Ekman et al., 2001; Kingma et al., 2016; Walters et al., 1992). Yet, few studies have  
57 compared the lifetime inclusive fitness outcomes of alternative reproductive tactics, especially in  
58 mixed-kin societies where dispersal polymorphisms are most common (Davidian et al., 2016).  
59 Thus, the evolutionary mechanism underlying the formation of mixed-kin societies remains  
60 largely unknown and can only be revealed by considering the lifetime inclusive fitness  
61 consequences of alternative reproductive tactics.

62

63 Here, we leveraged a 15-year longitudinal dataset from Kenya to examine how reproductive  
64 tactics in male cooperatively breeding superb starlings (*Lamprotornis superbus*) are influenced  
65 by pre- and postnatal social and ecological factors and impact lifetime inclusive fitness. Superb  
66 starlings are plural cooperative breeders in which both sexes help (Rubenstein, 2016, 2007a), and  
67 although males tend to be more philopatric than females, these mixed-kin social groups have low  
68 but variable kin structure overall as well as within both sexes (Pollack and Rubenstein, 2015;  
69 Rubenstein, 2016). While resident females never breed in their natal groups, both resident and

70 immigrant males can acquire breeding status (Rubenstein, 2016). These savanna-dwelling birds  
71 inhabit one of the most variable and unpredictable environments on earth (Rubenstein and  
72 Lovette, 2007), where high annual variability and unpredictability in seasonal rainfall governs  
73 insect prey availability (Rubenstein, 2007b). Rainfall is most variable during the dry season  
74 (Rubenstein, 2011), and both pre- and postnatal variation in dry season rainfall has been shown  
75 to influence many aspects of starling social behavior and life-history. In particular, prenatal  
76 rainfall influences offspring sex ratio (Rubenstein, 2007a), epigenetic modification of genes  
77 related to the avian stress response (Rubenstein et al., 2016), and male reproductive decisions  
78 (Rubenstein et al., 2016), whereas postnatal rainfall influences access to breeding opportunities  
79 for both sexes (Rubenstein, 2007c) and helping behavior (Guindre-Parker and Rubenstein, 2018).  
80 In addition, the social environment also impacts superb starling fitness, both survival (Guindre-  
81 Parker and Rubenstein, 2020) and reproductive success (Rubenstein, 2011).

82

83 To examine the environmental causes of alternative reproductive tactics in superb starlings, we  
84 first investigated how pre- and postnatal ecological and social factors influence male dispersal  
85 decisions. We predicted that in a harsh prenatal environment with low rainfall, particularly for  
86 small groups with a skewed sex ratio, parental effects may indirectly limit dispersal of male  
87 offspring by promoting helping behavior. Thus, males that remain in their natal group would be  
88 more likely to provide alloparental care prior to the age of dispersal than males that ultimately  
89 disperse. Similarly, in a harsh postnatal environment, male superb starlings would be more likely  
90 to remain in their natal group to evade the costs of dispersal or reap the benefits of philopatry,  
91 particularly in a social environment conducive to higher survival (large group size) and with  
92 greater access to reproductive opportunities (female-skewed sex ratio). Next, to understand the

93 fitness consequences of these alternative reproductive tactics, we compared access to  
94 reproductive opportunities, reproductive success, lifetime inclusive fitness, and survivorship of  
95 resident and immigrant males. According to the best-of-a-bad-job hypothesis, we predicted that  
96 the two alternative tactics would result in unequal lifetime inclusive fitness, regardless of the pre-  
97 or postnatal environments. Alternatively, if both dispersal and philopatry maximize individual  
98 fitness, then the two tactics would have equal lifetime inclusive fitness but exhibit reproductive  
99 tradeoffs such that individuals would have lower lifetime fitness when they adopt a phenotype  
100 not predicted by the prevailing environmental conditions. Ultimately, by linking the  
101 environmental causes and fitness consequences of alternative reproductive tactics in a  
102 cooperative breeder, we will be able to determine how a behavioral polymorphism of two  
103 fundamentally different reproductive phenotypes can persist and potentially give rise to mixed-  
104 kin cooperative societies.

105

## 106 **Results**

### 107 *Patterns of male dispersal*

108 Consistent with previous reports in this species (Rubenstein, 2016), we found that males were the  
109 primary philopatric sex; only 59 of 162 males (36%) in our marked social groups for whom we  
110 had complete lifetime data—from birth to death for natal males and immigration to death for  
111 immigrant males—were immigrants (compared to 121 of 224 (54%) of females). However, more  
112 than half of male breeders (30 of 59; 51%) were immigrants.

113

### 114 *Pre- and postnatal ecological and social predictors of male dispersal*

115 Next, we examined the role pre- and postnatal ecological and social factors play in influencing  
116 male dispersal decisions. We found that harsh prenatal ecological conditions limited dispersal  
117 such that males were less likely to disperse when they were born in years following low prenatal  
118 rainfall ( $Z = 1.97$ ,  $P = 0.049$ ,  $CI = 0.002-0.72$ ; Fig. 1, Table 1). However, both postnatal  
119 ecological and social conditions had no significant impact on the likelihood of males dispersing  
120 (Table 1), suggesting that male dispersal is influenced more by (i) prenatal than postnatal  
121 conditions and (ii) ecological rather than social factors. In addition, we found that males that  
122 subsequently dispersed were less likely to act as alloparents in their first year of life than males  
123 that subsequently remained in their natal group ( $\chi^2_1 = 5.05$ ,  $P = 0.02$ ).

124

### 125 *Fitness consequences of male dispersal decisions*

126 We then explored the fitness consequences of the different male dispersal decisions. More than  
127 half the males in the population (87 of 162 males; 54%) accrued zero inclusive fitness in their  
128 lifetimes (Fig. S3) (Rubenstein, 2016). While residents accrued higher indirect fitness than  
129 immigrants (Fig. 2C,  $U = 2350$ ,  $P = 0.05$ ), resident and immigrant males had equal direct and  
130 inclusive lifetime fitness (Fig. 2A-B; inclusive:  $U = 2828$ ,  $P = 0.43$ ; direct:  $U = 3115$ ,  $P = 0.66$ ),  
131 as well as equal survival likelihoods ( $Z = -0.04$ ,  $P = 0.97$ ,  $CI = -0.33-0.32$ ) (Fig. S4). Despite  
132 equal lifetime inclusive fitness, immigrants were more likely than residents to breed at least once  
133 in their lifetimes ( $\chi^2_1 = 7.39$ ,  $P = 0.01$ ), had higher lifetime breeding effort (the number of  
134 breeding attempts as a proportion of an individual's adult lifespan) ( $U = 3689$ ,  $P = 0.006$ ), and  
135 began breeding at a younger age ( $U = 265.5$ ,  $P = 0.01$ ). In contrast, residents that did breed had  
136 higher nest success than immigrant breeders ( $Z = 2.48$ ,  $P = 0.01$ ,  $CI = 0.28-2.33$ ). In addition,  
137 only lifetime breeding effort, and not birth status, affected a male's likelihood of accruing some

138 nonzero inclusive fitness during his lifetime (Fig. 3A, Table 2). However, among males with  
139 some lifetime inclusive fitness, residents accrued higher inclusive fitness than immigrants with  
140 the same amount of lifetime breeding effort (Fig. 3B, Table 2).

141  
142 Finally, we assessed whether there were reproductive tradeoffs for individuals that adopted the  
143 tactic not predicted by prenatal ecological conditions. Since we did not have precise rainfall data  
144 from the immigrants' natal sites (though rainfall is highly correlated spatially and temporally  
145 synchronous within the dispersal radius of our study site; see *SI*), we used a categorical measure  
146 of prenatal rainfall based on mean long-term prenatal rainfall at our study site (see *Methods* and  
147 *SI*). Consistent with the idea of reproductive tradeoffs and the hypothesis that the fitness  
148 consequences of alternative reproductive tactics depend on prenatal environmental conditions,  
149 we found that immigrant males were more likely to accrue nonzero lifetime inclusive fitness  
150 when born following periods of high prenatal rainfall, but that residents were more likely to  
151 accrue nonzero lifetime inclusive fitness when born following periods of low prenatal rainfall  
152 (Fig. 4, Table 3).

153

## 154 **Discussion**

155 Although mixed-kin cooperative groups characterized by low relatedness are surprisingly  
156 common (Riehl, 2013), how these societies arise and are maintained given the potential for high  
157 social conflict among unrelated group members competing for reproductive opportunities  
158 remains unclear. We examined the environmental causes and inclusive fitness consequences of  
159 dispersal decisions in male superb starlings living in a climatically variable and unpredictable  
160 savanna environment (Guindre-Parker and Rubenstein, 2020; Rubenstein and Lovette, 2007), for



161 whom philopatry and dispersal can both be pathways to reproductive opportunities (Rubenstein,  
162 2016). We found that dispersal in males is influenced by their parents' prenatal environment  
163 rather than the postnatal environment that the males experience as adolescents, suggesting that  
164 prenatal parental effects play an important role in governing dispersal decisions. Ultimately,  
165 natal dispersal and philopatry had equal lifetime inclusive fitness outcomes, meaning that they  
166 are two equal, alternative male reproductive tactics. Yet, the two tactics showed reproductive  
167 tradeoffs—immigrants had greater access to reproductive opportunities via the acquisition of  
168 dominant breeding positions, whereas residents that bred had higher reproductive success. When  
169 males adopted a tactic not predicted by prevailing prenatal environmental conditions, their  
170 lifetime inclusive fitness was reduced. Together, these results suggest that environmental  
171 variability experienced early in life may help maintain a reproductive polymorphism with equal  
172 lifetime inclusive fitness, which ultimately enables the formation and persistence of a mixed-kin  
173 cooperative society in an unpredictable environment.

174

175 Unlike in other cooperatively breeding species where the postnatal environment shapes dispersal  
176 decisions (Baglione et al., 2006; Nelson-Flower et al., 2018; Suh et al., 2020), male dispersal in  
177 superb starlings was only governed by prenatal ecological conditions. The effect of prenatal  
178 conditions on dispersal suggests that parental effects influence the dispersal phenotype of male  
179 superb starlings, a result that has been suggested previously for male reproductive opportunities  
180 in this species (Rubenstein et al., 2016). Parental effects, which can result from physiological or  
181 molecular modifications to offspring during development (Mousseau and Fox, 1998), may be  
182 particularly important in cooperatively breeding species (Russell and Lummaa, 2009) and  
183 species inhabiting unpredictable environments (Meylan et al., 2012). While the specific

184 physiological mechanisms of prenatal parental effects on dispersal remain unknown for this  
185 species, previous studies have demonstrated an effect of maternal condition on offspring sex  
186 allocation, maternal investment in eggs, and DNA methylation in superb starlings (Rubenstein,  
187 2007a; Rubenstein et al., 2016) and other vertebrates (Meylan et al., 2002; Silk and Brown,  
188 2008; Van Petegem et al., 2015). Studies of two other avian species, western bluebirds (*Sialia*  
189 *mexicana*) and great tits (*Parus major*), found an effect of maternal androgen deposition on  
190 offspring dispersal in response to ecological conditions (Duckworth, 2009; Tschirren et al.,  
191 2007). Viviparous lizards (*Lacerta vivipara*) show a similar effect (Meylan et al., 2002), and  
192 maternal hormones have also been shown to increase helping behavior in subordinate female  
193 meerkats (*Suricata suricatta*) (Dantzer et al., 2019). Further work in this and other cooperatively  
194 breeding species should examine the mechanism by which environmentally-mediated parental  
195 effects might influence future reproductive tactics adopted by offspring.

196

197 Parental effects can be selfish, to manipulate offspring phenotype in order to increase parental  
198 fitness, or anticipatory, to maximize offspring fitness (Marshall and Uller, 2007; Russell and  
199 Lummaa, 2009). We know that offspring sex ratio in superb starlings is male-biased when  
200 mothers are in poorer body condition following harsher prenatal conditions, a pattern that  
201 suggests that females maximize their inclusive fitness in an unpredictable environment by  
202 investing in the sex with lower fitness variance (Rubenstein, 2007a). However, our results here  
203 suggest that mothers could also be influencing cooperative behavior in their offspring because  
204 males that participated in alloparental care in their first year of life were subsequently more  
205 likely to remain in their natal group. Male superb starlings are more likely to become alloparents  
206 and help more than females (Rubenstein, 2011), and alloparents buffer the detrimental effects of

207 harsh environmental conditions on reproductive success in this species (Guindre-Parker and  
208 Rubenstein, 2018). Thus, prenatal parental effects promoting alloparental behavior following  
209 harsher prenatal conditions might serve to selfishly increase the parents' short-term future  
210 reproductive success and indirectly limit dispersal of male offspring (Dantzer et al., 2019).  
211 Although males born following benign prenatal conditions could, conversely, be more likely to  
212 disperse so as to reduce kin competition, this seems less probable because kin competition has  
213 actually been shown to decrease under benign environmental conditions in other cooperative  
214 species (Korb and Schmidinger, 2004; Nichols et al., 2012). Additionally, our results are  
215 consistent with the hypothesis that prenatal parental effects on dispersal in males are anticipatory  
216 because when males adopted the tactic predicted by the prevailing prenatal ecological conditions,  
217 they were more likely to accrue some inclusive fitness in their lifetimes. Since more than half of  
218 superb starling males fail to accrue any fitness in their lifetimes, largely due to high nest  
219 predation pressure (Rubenstein, 2016), securing any amount of nonzero lifetime fitness is crucial  
220 in this species, an idea consistent with the bet-hedging hypothesis proposed for this (Rubenstein,  
221 2011) and other social species (Kennedy et al., 2018). Males born following harsh prenatal  
222 conditions thus appear to benefit from avoiding the costs of dispersal and remaining in their natal  
223 group (Eikenaar et al., 2010; Stacey and Ligon, 1991), whereas males born following benign  
224 conditions might be better able to cope with the costs of dispersal and maximize their fitness by  
225 immigrating into another social group (Bergmüller et al., 2005).

226

227 In contrast to other studies in kin-only cooperatively breeding societies (e.g., Ekman et al., 2001;  
228 Ligon and Ligon, 1982; MacColl and Hatchwell, 2004; Sparkman et al., 2011; Walters et al.,  
229 1992), we found that the two reproductive tactics adopted by males—natal dispersal and

230 philopatry—have equal lifetime inclusive fitness in a mixed-kin cooperative society. Although  
231 resident males had significantly higher lifetime indirect reproductive success than immigrants, an  
232 unsurprising result given the kin structuring among males in superb starling social groups  
233 (Rubenstein, 2016), this was more than balanced out by the relatively larger contribution of  
234 lifetime direct fitness. While it was not logistically possible to compare the fitness of resident  
235 and dispersing males born to the same social group, our approach of comparing resident to  
236 immigrant males has proven informative in other avian studies (Green and Hatchwell, 2018).  
237 Furthermore, we show that the equal lifetime inclusive fitness outcomes of the two dispersal  
238 tactics are due to a reproductive tradeoff, an idea that has been proposed theoretically (Moran,  
239 1992; Stearns, 1989) but rarely tested empirically. Although immigrant superb starlings had  
240 greater access to reproductive opportunities via the acquisition of dominant breeding positions  
241 with the group, residents that acquired breeding positions were more likely to successfully fledge  
242 young. Residents can therefore afford to have lower access to breeding opportunities over their  
243 lifetimes since they have higher nest success. This higher nest success is likely due to greater  
244 alloparental care at nests of resident males who have more kin in the group to act as helpers than  
245 do immigrants (Emlen and Wrege, 1988; Komdeur, 1994; Wright et al., 2010). Thus, for superb  
246 starling males, philopatry leads to lower reproductive quantity but higher quality, whereas  
247 dispersal results in higher reproductive quantity but lower quality. Since immigrants and  
248 residents are equally likely to survive from one breeding season to the next, these differences in  
249 reproductive quality and quantity are unrelated to longevity (Walters et al., 1992). Together these  
250 results suggest that the two alternative dispersal tactics are equivalent in terms of lifetime  
251 inclusive fitness and refute the hypothesis that remaining in the natal group—the tactic favored  
252 following harsh prenatal conditions—is simply making “the-best-of-a-bad-job” (Dawkins, 1980;

253 Koprowski, 1993). The coexistence of resident and immigrant males in cooperative social groups  
254 has been shown to be similarly facilitated by equal reproductive rates in spotted hyenas (*Crocuta*  
255 *crocuta*) (Davidian et al., 2016) and inclusive fitness at different age stages in dwarf mongooses  
256 (*Helogale parvula*) (Creel and Rabenold, 1994), both species that live in mixed-kin societies.  
257 However, to the best of our knowledge, ours is the first study in a cooperatively breeding  
258 vertebrate to demonstrate equal lifetime inclusive fitness outcomes of alternative dispersal  
259 tactics.

260

261 This behavioral polymorphism in reproductive tactics is likely maintained by a flexible response  
262 to high and unpredictable environmental variability (West Eberhard, 1989). A temporally  
263 variable and unpredictable environment has been shown both theoretically (Moran, 1992) and  
264 empirically (Lampert and Linsenmair, 2002) to generate conditional strategies that result in a  
265 developmental switch between alternative tactics. If a behavioral polymorphism has a genetic (or  
266 perhaps epigenetic) basis (Beldade et al., 2011; Saastamoinen et al., 2018), environmental  
267 variability can reverse the selective differential between two tactics from one year to the next,  
268 resulting in alternative tactics with equal fitness outcomes (Gibbs and Grant, 1987; Moran,  
269 1992). The savanna habitat inhabited by superb starlings has high temporal ecological variability  
270 (Rubenstein, 2011; Rubenstein and Lovette, 2007) that may allow both dispersal tactics to  
271 persist, resulting in the formation of mixed-kin cooperative groups. Interestingly, spotted hyenas  
272 (Holekamp and Smale, 1998) and dwarf mongooses (Creel and Rabenold, 1994) experience the  
273 same unpredictable savanna environments, suggesting that environmental uncertainty—and  
274 perhaps oscillating selection pressures more generally—maintains alternative dispersal tactics  
275 and leads to the formation of and/or stabilizes societies with low kin structure. Oscillating

276 selection may be particularly important in arid and semi-arid environments where climatic  
277 variability is high (Gibbs and Grant, 1987), and may help explain the evolution of both mixed-  
278 kin societies and plural breeding more generally. Indeed, many other plural cooperatively  
279 breeding birds across the globe live in harsh arid and semi-arid environments characterized by  
280 unpredictable variation in rainfall and food resources (e.g. Brown et al., 1997; Clarke, 1984;  
281 Curry and Grant, 1990; Hegner et al., 1982; Riehl and Jara, 2009; Rowley, 1978; Rowley et al.,  
282 1989; Russell et al., 2010; Veltman, 2008). While we do not yet know whether dispersal has a  
283 genetic basis in superb starlings—though there are indications of a potential epigenetic basis  
284 (Rubenstein et al., 2016)—our results suggest that the two tactics face oscillating selection since  
285 the relative lifetime inclusive fitness of the two tactics fluctuates in response to prenatal  
286 environmental conditions. Ultimately, identifying the mechanism by which prenatal parental  
287 effects lead to developmental differences that determine male reproductive tactics will be  
288 important for understanding the role that environmentally-driven selection pressures play in  
289 shaping behavioral polymorphisms in this and other social species.

290

291 In summary, we have shown that natal dispersal and philopatry in male cooperatively breeding  
292 superb starlings represent two alternative reproductive tactics with equal fitness. The tactics are  
293 mediated by parental effects during development and are likely maintained by oscillating  
294 selection pressures characteristic of their variable and unpredictable savanna environment. Our  
295 study suggests a direct link between environmental uncertainty, behavioral polymorphism, and  
296 the evolution of mixed-kin animal societies that cannot be explained by kin selection alone. Our  
297 work also underscores the importance of prenatal environmental conditions and parental effects  
298 in determining offspring phenotype, especially in cooperative societies where early life

299 conditions have direct implications on the future fitness of both parents and offspring. Moreover,  
300 the direct benefits derived from environmental selective pressures appear to play a significant  
301 role in the evolution and maintenance of cooperative societies, alongside or in the absence of kin  
302 selection. Ultimately, understanding how fluctuation in early life environmental conditions helps  
303 mediate reproductive tradeoffs and lifetime fitness is critical in an era of rapid anthropogenic  
304 climate change because climatic uncertainty is only likely to increase across much of the globe  
305 for the foreseeable future.

306

## 307 **Materials and Methods**

### 308 *Data collection*

309 Nine superb starling social groups have been monitored continuously since 2001 at the Mpala  
310 Research Centre, Kenya (0° 17'N 37° 52'E) (Rubenstein, 2016, 2006). Groups (mean size  $\pm$  SD  
311 =  $22 \pm 12$ ) defend stable territories year-round and consist of breeding (mean  $\pm$  SD =  $2.70 \pm 1.49$   
312 pairs per group) and non-breeding individuals, some of whom act as alloparents that guard  
313 and/or provision young (Guindre-Parker and Rubenstein, 2018; Rubenstein, 2016). Birds breed  
314 twice a year during the long (March-June) and short rains (October-November) (Rubenstein,  
315 2016). We used data from the beginning of the 2003 long rains breeding season through the end  
316 of the 2017 long rains breeding season ( $N = 31$  breeding seasons over 15 years), since not all  
317 birds in the study population were banded until 2003.

318

319 Birds were banded with a unique combination of colored leg bands and a numbered metal ring.  
320 Hatchlings were banded in the nest at seven days of age; all other individuals were captured in  
321 baited pull-string traps or mist nets and banded after fledging from the nest (Rubenstein, 2006).

322 If banded post-fledgling, age was assessed via eye color as juvenile (black eyes), sub-adult (less  
323 than one year of age; cloudy eyes), or adult (one year of age or older; white eyes) (Guindre-  
324 Parker and Rubenstein, 2020). Birth status (i.e., resident or immigrant) was assigned based on  
325 age at banding and genetic parentage. Residents were either banded as hatchlings in the nest or  
326 as juveniles whose parents were genetically identified as members of the same group using 15  
327 microsatellite markers (Rubenstein, 2005). We also used the same microsatellite markers to  
328 estimate (i) parentage and direct reproductive success in Cervus v3.0 (Kalinowski et al., 2007)  
329 using methods described previously for this species (*sensu* Apakupakul and Rubenstein, 2015;  
330 Rubenstein, 2007c, 2007d; Weinman et al., 2015) and (ii) pairwise relatedness (*sensu* Queller  
331 and Goodnight, 1989) between all individuals with the R package *related* (Pew et al., 2015).  
332 Immigrants were defined as those banded as juveniles or older whose parents were not  
333 genetically identified as belonging to the same group. Sex was determined genetically (Griffiths  
334 et al., 1998) as previously described for this species (Rubenstein, 2006).

335  
336 We performed daily nest searches throughout the breeding season. Active nests were observed  
337 with a spotting scope for 60-120 min per observation period (total observation time per nest:  
338 mean  $\pm$  SD = 314.33  $\pm$  248.82 min). All superb starlings within 30 m of the nest were identified,  
339 and their times of arrival and departure were recorded (Rubenstein, 2007d). Parents are the  
340 primary nest builders, and only the mother incubates the eggs (Rubenstein, 2007d). All other  
341 members of the social group seen visiting or guarding the nest were categorized as alloparents  
342 (Guindre-Parker and Rubenstein, 2018).

343



344 Census data were used to estimate pre- and postnatal group size and sex ratio (calculated by  
345 dividing the number of males by the sum of number of males and immigrant females in the  
346 group to estimate potential mate competition). Groups were opportunistically censused year-  
347 round and each individual marked as either present or absent in its social group twice a year in 6-  
348 month increments. Individuals not seen for five or more breeding seasons (i.e. 2.5 years) were  
349 assumed to be dead (Guindre-Parker and Rubenstein, 2020; Pollack and Rubenstein, 2015). We  
350 inferred that the dispersal window for males is around one year of age using four lines of  
351 evidence: (i) the modal age at which males disappear from their natal group; (ii) the categorical  
352 age of immigrant males dispersing into the study population ( $< 1$  year of age or  $\geq 1$  year of age);  
353 (iii) the likelihood of males being detected in the census in their first year of life; and (iv) the  
354 minimum age of first breeding by resident males (see *SI* for details). If a male was observed in its  
355 natal group after one year of age, we classified it as a resident; if not, we classified it as having  
356 dispersed. Although we could not completely distinguish between dispersal and mortality, the  
357 positive relationship between likelihood of dispersal and prenatal rainfall (see *Results*) suggests  
358 that these males did indeed disperse since we would have expected a negative relationship if  
359 mortality were higher following harsh prenatal environmental conditions. Following the same  
360 lines of evidence, immigrant males were assumed to have entered the group at about one year of  
361 age (see *SI*). Since most immigrants into the study population are first detected in the period  
362 between the short and long rains breeding seasons, we defined the postnatal period and dispersal  
363 window as the pre-breeding season before an individual turned one year old. Ecological and  
364 social conditions experienced by an individual during this period were termed postnatal factors.  
365 In contrast, ecological and social conditions experienced by parents before the breeding season  
366 of an individual's birth were termed prenatal factors.

367  
368 Daily rainfall was measured using an automated Hydrological Services TB3 Tipping Bucket  
369 Rain Gauge at Mpala Research Centre (Caylor et al., 2017), supplemented by a manual gauge at  
370 the same location when the automated gauge failed (Rubenstein, 2011). To calculate pre- and  
371 postnatal rainfall, we summed the rainfall between the two weeks after the last nest of the  
372 previous breeding season through the two weeks before the first nest of the next breeding season  
373 for each short or long rains breeding season (Fig. S1). This approach differs slightly from  
374 previously published studies in this system that used a fixed time window to approximate  
375 prenatal conditions (e.g., Guindre-Parker and Rubenstein, 2020; Rubenstein, 2007c; Rubenstein  
376 et al., 2016) because here we are using data from both the long and short rains breeding seasons.

377  
378 ***Data analysis***

379 For all analyses, we only used data from individuals for whom we had complete lifetime life  
380 histories (386 of 1177 birds; 33% of banded individuals in the study population), excluding birds  
381 that were born prior to 2003 when monitoring in all social groups began, as well as those that  
382 were still alive in 2017. First, we examined patterns of male dispersal by quantifying the  
383 proportion of immigrant adult males and females in the study population ( $N_M = 162$ ,  $N_F = 224$ ).  
384 We determined how breeding opportunities were shared between immigrants and residents by  
385 calculating the proportion of immigrant breeders of both sexes in the study population ( $N_M = 59$ ,  
386  $N_F = 121$ ).

387  
388 Next, we investigated the effect of pre- and postnatal ecological and social factors on the  
389 likelihood of a male dispersing using a general linear model (GLM) with a binomial error

390 structure and “logit” link function. We used the binomial response of reproductive tactic (1 =  
391 dispersed, 0 = remained) as the dependent variable ( $N_{dispersed} = 52$ ,  $N_{remained} = 99$ ). Fixed effects in  
392 the full model, which were standardized using z-scores (Schiezeth, 2010), included pre- and  
393 postnatal rainfall, postnatal group size, and postnatal sex ratio. Since pre- and postnatal group  
394 size and sex ratio were highly correlated (group size:  $R^2 = 0.95$ ; sex ratio:  $R^2 = 0.80$ ), we only  
395 included postnatal group size and sex ratio in the final model. Including pre- instead of postnatal  
396 group size and sex ratio in the model yielded qualitatively similar results. All two-way  
397 interactions were included in the model, but later removed if their effect was not significant  
398 (Engqvist, 2005). Since including breeding season and social group as random effects led to  
399 singular model fits, they were excluded from the full model. We constructed models with all  
400 possible combinations of the fixed effects and averaged the best-fitting models ( $AICc < 2$ )  
401 (Grueber et al., 2011) using the functions “dredge” and “model.avg” in the R package *MuMIn*  
402 (Bartoń, 2019) (Table S1). Furthermore, to investigate the relationship between alloparental care  
403 provided by males prior to reaching one year of age and their subsequent reproductive tactic, we  
404 used a Chi-square test to compare alloparental status (ever alloparent/never alloparent) and  
405 reproductive tactic (dispersed/remained) for all natal males ( $N = 155$ ).

406

407 Finally, we sought to understand the fitness consequences of the alternative reproductive tactics.  
408 Although it was not possible to compare the fitness consequences of the alternative reproductive  
409 tactics adopted by males born from same social group (since dispersers rarely remain within the  
410 study population; only 3 males in 15 years), we compared access to reproductive opportunities,  
411 reproductive success, lifetime inclusive fitness, and survivorship of resident and immigrant  
412 males ( $N_{Imm} = 59$ ,  $N_{Res} = 103$ ). Previous studies of cooperatively breeding birds have used the

413 same approach (e.g., Green and Hatchwell, 2018). Access to reproductive opportunities was  
414 quantified as: (i) the likelihood of a male ever breeding in its lifetime (Chi-squared test); (ii)  
415 lifetime breeding effort, or the number of breeding attempts as a proportion of an individual's  
416 adult lifespan (Mann-Whitney test with continuity correction); and (iii) for males that bred at  
417 least once ( $N_{Imm} = 30$ ,  $N_{Res} = 29$ ), the age at first breeding (Mann-Whitney test with continuity  
418 correction). To evaluate the likelihood of a male obtaining any reproductive success in their  
419 lifetimes, we modeled the effect of birth status on nest success (1 = succeeded, 0 = failed) using  
420 a GLM with a binomial error structure and “logit” link function ( $N_{Succeeded} = 49$ ,  $N_{Failed} = 229$ ).  
421 Since some males nested multiple times in their lifetimes, we included individual as a random  
422 effect in the model.

423

424 Following Green and Hatchwell (Green and Hatchwell, 2018), we calculated lifetime inclusive  
425 fitness ( $I$ ) as the sum of lifetime direct and indirect fitness according to the equation

426

$$427 \quad I = \left[ \sum_{j=1}^J M_j ER - \frac{\sum_{j=1}^J \sum_{n=1}^{N_j} \sum_{m=1}^{M_j} e_{nj} r_{mnj}}{2} \right]_{direct\ fitness} + \left[ \sum_{o=1}^O \sum_{m=1}^{M_o} e_o r_{mo} \right]_{indirect\ fitness} \quad (1),$$

428

429 where direct fitness was calculated as the product of the number of fledglings per nest ( $M_j$ ),  
430 paternal care effort ( $E = 0.5$ , the other half being attributed to the mother), and the mean  
431 offspring-father relatedness ( $R = 0.5$ ) summed over all successful nests ( $J$ ), minus half of the  
432 indirect fitness attributed to alloparents (the other half being subtracted from the mother's direct  
433 fitness). Indirect fitness attributed to alloparents at each nest was calculated as the product of the  
434 mean alloparental effort at a nest per social group per breeding season ( $e_{nj}$ ) and the alloparent's  
435 relatedness to the fledglings ( $r_{mnj}$ ), summed over all fledglings ( $M_j$ ) and alloparents at the nest

436 ( $N_j$ ) for all successful nests ( $J$ ). Alloparents with  $r_{mnj} \leq 0$  received no indirect fitness. Indirect  
437 fitness of the focal male was similarly calculated as the product of the mean alloparental effort  
438 ( $e_o$ ) and its relatedness to the fledglings ( $r_{mo}$ ), summed over all of the nests he visited in his  
439 lifetime ( $O$ ). We used population means instead of individual measures of alloparental effort  
440 because total observation time for nests varied. Alloparental effort was calculated as the  
441 proportion of time an individual spent attending a nest (both guarding and bringing food) relative  
442 to the length of the observation period (*sensu* Guindre-Parker and Rubenstein, 2018).

443

444 We compared the lifetime inclusive, direct, and indirect fitness of resident and immigrant males  
445 using a Mann-Whitney test with continuity correction ( $N_{Imm} = 59$ ,  $N_{Res} = 103$ ). To determine  
446 whether differences in reproductive access and success between resident and immigrant males  
447 affected their lifetime inclusive fitness, we used GLMs to model the effect of lifetime breeding  
448 effort and birth status on lifetime inclusive fitness of males. The first model had a binomial  
449 response (zero/nonzero lifetime inclusive fitness) and a “logit” link function ( $N_{Imm} = 59$ ,  $N_{Res} =$   
450 103). The second model had a continuous dependent variable of all nonzero inclusive fitness  
451 observations ( $N_{Imm} = 25$ ,  $N_{Res} = 50$ ) with an “identity” link function and a gamma error  
452 distribution. The fixed effects for both models were lifetime breeding effort and birth status.

453

454 We also built a GLM to investigate the lifetime fitness consequences of adopting the tactic not  
455 predicted by the prevailing environmental conditions, with a binomial response variable  
456 (zero/nonzero lifetime inclusive fitness) and prenatal rainfall and birth status as fixed effects  
457 ( $N_{Imm} = 53$ ,  $N_{Res} = 99$ ). Although we did not have precise rainfall data from the immigrants’ natal  
458 sites, we used monthly rainfall data from three sites within the dispersal radius (~30 km) of our

459 study population (Mpala Research Centre, MRC)—UHURU Central (12 km from MRC)  
460 (Goheen et al., 2013), UHURU North (20 km from MRC) (Goheen et al., 2013), and Nanyuki  
461 (38 km from MRC) (East African Livestock Early Warning System)—to demonstrate high  
462 spatiotemporal correlation of prenatal rainfall for immigrant and natal males (Table S2).  
463 Nonetheless, to take a more conservative approach, we used a categorical measure based on  
464 mean long-term prenatal rainfall at Mpala Research Centre (low prenatal rainfall: rainfall < long-  
465 term mean; high prenatal rainfall: rainfall > long-term mean).

466  
467 Finally, we used a time-varying Cox proportional hazard model to determine whether birth status  
468 affected male survival ( $N_{Imm} = 59$ ,  $N_{Res} = 103$ ) (*sensu* Guindre-Parker and Rubenstein, 2020).

469 The model was built using the R package *survival* (Therneau, 2020). We checked that our dataset  
470 did not violate the proportional hazard assumption using the “cox.zph” function. We performed  
471 all data analysis in R (R Core Team, 2019).

472

473 **Data Availability.** Data and R code are available on Dryad at

474 <https://doi.org/10.5061/dryad.m37pvmd1p>

475

476 **Acknowledgements.** We thank B. Heidinger, M. Uriarte, M. VanAcker, J. Jensen, P. Downing,  
477 S. Caro, S. Siller, Y. Cheng, A. Earl, J. Guan, S. Guindre-Parker, Y. Haba, and E. Greig for  
478 statistical advice and comments on the manuscript. We are grateful to W. Watetu, G. Manyas  
479 and J. Mosiany for their assistance in the field, as well as all other volunteers, students and field  
480 assistants that have contributed to this project since its inception in 2001.

481 **References**

- 482 Apakupakul K, Rubenstein DR. 2015. Bateman's principle is reversed in a cooperatively  
483 breeding bird. *Biol Lett* **11**. doi:10.1098/rsbl.2015.0034
- 484 Baglione V, Canestrari D, Marcos JM, Ekman J. 2006. Experimentally increased food resources  
485 in the natal territory promote offspring philopatry and helping in cooperatively breeding  
486 carrion crows. *Proc R Soc B Biol Sci* **273**:1529–1535. doi:10.1098/rspb.2006.3481
- 487 Baglione V, Marcos JM, Canestrari D, Ekman J. 2002. Direct fitness benefits of group living in a  
488 complex cooperative society of carrion crows, *Corvus corone corone*. *Anim Behav* **64**:887–  
489 893. doi:10.1006/anbe.2002.2007
- 490 Bartoń K. 2019. MuMIn: Multi-Model Inference R package Version 1.43.15.
- 491 Beldade P, Mateus ARA, Keller RA. 2011. Evolution and molecular mechanisms of adaptive  
492 developmental plasticity. *Mol Ecol* **20**:1347–1363. doi:10.1111/j.1365-294X.2011.05016.x
- 493 Bergmüller R, Heg D, Taborsky M. 2005. Helpers in a cooperatively breeding cichlid stay and  
494 pay or disperse and breed, depending on ecological constraints. *Proc R Soc B Biol Sci*  
495 **272**:325–331. doi:10.1098/rspb.2004.2960
- 496 Brown JL, Brown ER, Sedransk J, Ritter S. 1997. Dominance, age, and reproductive success in a  
497 complex society: A long-term study of the Mexican Jay. *Auk* **114**:279–286.  
498 doi:10.2307/4089168
- 499 Caylor KK, Gitonga J, Martins DJ. 2017. Mpala Research Centre Meteorological and  
500 Hydrological Dataset [Datafile].
- 501 Clarke MF. 1984. Co-operative breeding by the Australian Bell Miner *Manorina melanophrys*  
502 Latham: A test of kin selection theory. *Behav Ecol Sociobiol* **14**:137–146.  
503 doi:10.1007/BF00291904

- 504 Clutton-Brock TH. 2002. Breeding together: kin selection and mutualism in cooperative  
505 vertebrates. *Science* **296**:69–72. doi:10.1126/science.296.5565.69
- 506 Creel SR, Rabenold KN. 1994. Inclusive fitness and reproductive strategies in dwarf mongooses.  
507 *Behav Ecol* **5**:339–348.
- 508 Curry RL, Grant PR. 1990. Galapagos mockingbirds: territorial cooperative breeding in a  
509 climatically variable environment In: Stacey PB, Koenig WD, editors. Cooperative  
510 Breeding in Birds. Cambridge: Cambridge University Press. pp. 291–331.
- 511 Dantzer B, Dubuc C, Goncalves IB, Cram DL, Bennett NC, Ganswindt A, Heistermann M,  
512 Duncan C, Gaynor D, Clutton-Brock TH. 2019. The development of individual differences  
513 in cooperative behaviour: Maternal glucocorticoid hormones alter helping behaviour of  
514 offspring in wild meerkats. *Philos Trans R Soc B Biol Sci* **374**. doi:10.1098/rstb.2018.0117
- 515 Davidian E, Courtiol A, Wachter B, Hofer H, Höner OP. 2016. Why do some males choose to  
516 breed at home when most other males disperse? *Sci Adv* **2**:e1501236.  
517 doi:10.1126/sciadv.1501236
- 518 Dawkins R. 1980. Good strategy or evolutionarily stable strategy In: Barlow GW, Silverberg J.,  
519 editors. Sociobiology: Beyond Nature/Nurture. Boulder: Westview Press. pp. 331–367.
- 520 Duckworth RA. 2009. Maternal effects and range expansion: A key factor in a dynamic process?  
521 *Philos Trans R Soc B Biol Sci* **364**:1075–1086. doi:10.1098/rstb.2008.0294
- 522 Eikenaar C, Brouwer L, Komdeur J, Richardson DS. 2010. Sex biased natal dispersal is not a  
523 fixed trait in a stable population of Seychelles warblers. *Behaviour* **147**:1577–1590.  
524 doi:10.1163/000579510X510511
- 525 Ekman J, Eggers S, Griesser M, Tegelström H. 2001. Queuing for preferred territories: Delayed  
526 dispersal of Siberian jays. *J Anim Ecol* **70**:317–324. doi:10.1046/j.1365-2656.2001.00490.x



- 527 Emlen ST. 1994. Benefits, constraints and the evolution of the family. *Trends Ecol Evol* **9**:282–  
528 285. doi:10.1016/0169-5347(94)90030-2
- 529 Emlen ST, Wrege PH. 1988. The role of kinship in helping decisions among white-fronted bee-  
530 eaters. *Behav Ecol Sociobiol* **23**:305–315. doi:10.1007/BF00300577
- 531 Engqvist L. 2005. The mistreatment of covariate interaction terms in linear model analyses of  
532 behavioural and evolutionary ecology studies. *Anim Behav* **70**:967–971.  
533 doi:10.1016/j.anbehav.2005.01.016
- 534 Gibbs HL, Grant PR. 1987. Oscillating selection on Darwin’s finches. *Nature* **327**:511–513.  
535 doi:10.1038/327511a0
- 536 Goheen JR, Palmer TM, Charles GK, Helgen KM, Kinyua SN, Maclean JE, Turner BL, Young  
537 HS, Pringle RM. 2013. Piecewise Disassembly of a Large-Herbivore Community across a  
538 Rainfall Gradient: The UHURU Experiment. *PLoS One* **8**:e55192.  
539 doi:10.1371/journal.pone.0055192
- 540 Green JP, Hatchwell BJ. 2018. Inclusive fitness consequences of dispersal decisions in a  
541 cooperatively breeding bird, the long-tailed tit (*Aegithalos caudatus*). *Proc Natl Acad Sci*  
542 201815873. doi:10.1073/PNAS.1815873115
- 543 Greenwood PJ, Harvey PH. 1982. The natal and breeding dispersal of birds. *Annu Rev Ecol Syst*  
544 1–21.
- 545 Griffiths R, Double MC, Orr K, Dawson RJG. 1998. A DNA test to sex most birds. *Mol Ecol*  
546 **7**:1071–1075. doi:10.1046/j.1365-294x.1998.00389.x
- 547 Grueber CE, Nakagawa S, Laws RJ, Jamieson IG. 2011. Multimodel inference in ecology and  
548 evolution: Challenges and solutions. *J Evol Biol* **24**:699–711. doi:10.1111/j.1420-  
549 9101.2010.02210.x

- 550 Guindre-Parker S, Rubenstein DR. 2020. Survival benefits of group living in a fluctuating  
551 environment. *Am Nat* **195**:1027–1036. doi:10.1086/708496
- 552 Guindre-Parker S, Rubenstein DR. 2018. Multiple benefits of alloparental care in a fluctuating  
553 environment. *R Soc Open Sci* **5**:172406. doi:10.1098/rsos.172406
- 554 Hamilton WD. 1964a. The Genetical Evolution of Social Behavior II. *J Theor Biol* **7**:1–52.  
555 doi:10.1016/0022-5193(64)90039-6
- 556 Hamilton WD. 1964b. The genetical evolution of social behaviour. I. *J Theor Biol* **7**:1–16.  
557 doi:10.1016/0022-5193(64)90038-4
- 558 Hegner RE, Emlen ST, Demong NJ. 1982. Spatial organization of the white-fronted bee-eater  
559 264–266.
- 560 Holekamp KE, Smale L. 1998. Dispersal status influences hormones and behavior in the male  
561 spotted hyena. *Horm Behav* **33**:205–216. doi:10.1006/hbeh.1998.1450
- 562 Kaiser SA, Martin TE, Oteyza JC, Armstad C, Fleischer RC. 2018. Direct fitness benefits and  
563 kinship of social foraging groups in an Old World tropical babbler. *Behav Ecol* **29**:468–478.  
564 doi:10.1093/beheco/ax196
- 565 Kalinowski ST, Taper ML, Marshall TC. 2007. Revising how the computer program CERVUS  
566 accommodates genotyping error increases success in paternity assignment. *Mol Ecol*  
567 **16**:1099–1106. doi:10.1111/j.1365-294X.2007.03089.x
- 568 Kennedy P, Higginson AD, Radford AN, Sumner S. 2018. Altruism in a volatile world. *Nature*  
569 **555**:359–362. doi:10.1038/nature25965
- 570 Kingma SA, Bebbington K, Hammers M, Richardson DS, Komdeur J. 2016. Delayed dispersal  
571 and the cost and benefits of different routes to independent breeding in a cooperative  
572 breeding bird. *Evolution* **2595–2610**. doi:10.1111/evo.13071

- 573 Komdeur J. 1994. The effect of kinship on helping in the cooperative breeding Seychelles  
574 warbler (*Acrocephalus sechellensis*). *Proc R Soc B Biol Sci* **256**:47–52.  
575 doi:10.1098/rspb.1994.0047
- 576 Koprowski JL. 1993. Alternative reproductive tactics in male eastern gray squirrels: “making the  
577 best of a bad job.” *Behav Ecol* **4**:165–171. doi:10.1093/beheco/4.2.165
- 578 Korb J, Schmidinger S. 2004. Help or disperse? Cooperation in termites influenced by food  
579 conditions. *Behav Ecol Sociobiol* **56**:89–95. doi:10.1007/s00265-004-0757-x
- 580 Lampert KP, Linsenmair KE. 2002. Alternative life cycle strategies in the West African reed  
581 frog *Hyperolius nitidulus*: The answer to an unpredictable environment? *Oecologia*  
582 **130**:364–372. doi:10.1007/s00442-001-0821-4
- 583 Ligon JD, Ligon SH. 1982. The cooperative breeding behavior of the green woodhoopoe. *Sci Am*  
584 **247**:126–134. doi:10.1038/scientificamerican0782-126
- 585 Liu M, Zhong QD, Cheng YR, Li SH, Fang S, Pu CE, Yuan HW, Shen SF. 2015. The genetic  
586 relatedness in groups of joint-nesting Taiwan yuhinas: Low genetic relatedness with  
587 preferences for male kin. *PLoS One* **10**:1–15. doi:10.1371/journal.pone.0127341
- 588 MacColl ADC, Hatchwell BJ. 2004. Determinants of lifetime fitness in a cooperative breeder,  
589 the long-tailed tit *Aegithalos caudatus*. *J Anim Ecol* **73**:1137–1148. doi:10.1111/j.0021-  
590 8790.2004.00887.x
- 591 Marshall DJ, Uller T. 2007. Why is a maternal effect adaptive? *Oikos* **116**:1957–1963.  
592 doi:10.1111/j.2007.0030-1299.16203.x
- 593 Matthysen E. 2012. Multicausality of dispersal : a review *Dispersal Ecology and Evolution*.  
594 Oxford University Press.
- 595 Meylan S, Belliure J, Clobert J, De Fraipont M. 2002. Stress and body condition as prenatal and

- 596 postnatal determinants of dispersal in the common lizard (*Lacerta vivipara*). *Horm Behav*  
597 **42**:319–326. doi:10.1006/hbeh.2002.1827
- 598 Meylan S, Miles DB, Clobert J. 2012. Hormonally mediated maternal effects, individual strategy  
599 and global change. *Philos Trans R Soc B Biol Sci* **367**:1647–1664.  
600 doi:10.1098/rstb.2012.0020
- 601 Moran NA. 1992. The evolutionary maintenance of alternative phenotypes. *Am Nat* **139**:971–  
602 989. doi:10.1086/285369
- 603 Mousseau TA, Fox CW. 1998. The adaptive significance of maternal effects. *Trends Ecol Evol*  
604 **13**:403–407. doi:10.1016/S0169-5347(98)01472-4
- 605 Nelson-Flower MJ, Wiley EM, Flower TP, Ridley AR. 2018. Individual dispersal delays in a  
606 cooperative breeder: Ecological constraints, the benefits of philopatry and the social queue  
607 for dominance. *J Anim Ecol*. doi:10.1111/1365-2656.12814
- 608 Nichols HJ, Bell MBV, Hodge SJ, Cant MA. 2012. Resource limitation moderates the adaptive  
609 suppression of subordinate breeding in a cooperatively breeding mongoose. *Behav Ecol*  
610 **23**:635–642. doi:10.1093/beheco/ars008
- 611 Pew J, Wang J, Muir P, Frasier T. 2015. related: an R package for analyzing pairwise relatedness  
612 data based on codominant molecular markers.
- 613 Pollack L, Rubenstein DR. 2015. The fitness consequences of kin-biased dispersal in a  
614 cooperatively breeding bird. *Biol Lett* **11**:20150336. doi:10.1098/rsbl.2015.0336
- 615 Queller DC, Goodnight KF. 1989. Estimating Relatedness Using Genetic Markers. *Evolution*  
616 **43**:258. doi:10.2307/2409206
- 617 R Core Team. 2019. R: A language and environment for statistical computing.
- 618 Reyer HU. 1980. Flexible helper structure as an ecological adaptation in the pied kingfisher

- 619 (Ceryle rudis rudis L.). *Behav Ecol Sociobiol* **6**:219–227. doi:10.1007/BF00569203
- 620 Riehl CP. 2013. Evolutionary routes to non-kin cooperative breeding in birds. *Proc R Soc*  
621 *London B Biol Sci* **280**:20132245.
- 622 Riehl CP, Jara L. 2009. Natural history and reproductive biology of the communally breeding  
623 Greater Ani (*Crotophaga major*) at Gatún Lake, Panama. *Wilson J Ornithol* **121**:679–687.  
624 doi:10.1676/09-017.1
- 625 Rowley I. 1978. Communal Activities Among White-Winged Choughs *Corcorax*  
626 *Melanorhamphus*. *Ibis* **120**:178–197. doi:10.1111/j.1474-919X.1978.tb06774.x
- 627 Rowley I, Russell E, Payne RB, Payne LL. 1989. Plural breeding in the Splendid Fairy-wren,  
628 *Malurus splendens* (Aves: Maluridae), a cooperative breeder. *Ethology* **83**:229–247.
- 629 Rubenstein DR. 2016. Superb starlings: cooperation and conflict in an unpredictable  
630 environment In: Koenig Walter D, Dickinson JL, editors. *Cooperative Breeding in*  
631 *Vertebrates: Studies of Ecology, Evolution, and Behavior*. Cambridge University Press. pp.  
632 181–196.
- 633 Rubenstein DR. 2011. Spatiotemporal environmental variation, risk aversion, and the evolution  
634 of cooperative breeding as a bet-hedging strategy. *Proc Natl Acad Sci* **108**:10816–10822.  
635 doi:10.1073/pnas.1100303108
- 636 Rubenstein DR. 2007a. Temporal but Not Spatial Environmental Variation Drives Adaptive  
637 Offspring Sex Allocation in a Plural Cooperative Breeder. *Am Nat* **170**:155.  
638 doi:10.2307/4541067
- 639 Rubenstein DR. 2007b. Territory quality drives intraspecific patterns of extrapair paternity.  
640 *Behav Ecol* **18**:1058–1064. doi:10.1093/beheco/arm077
- 641 Rubenstein DR. 2007c. Stress hormones and sociality: integrating social and environmental

- 642 stressors. *Proc R Soc B Biol Sci* **274**:967–975. doi:10.1098/rspb.2006.0051
- 643 Rubenstein DR. 2007d. Female extrapair mate choice in a cooperative breeder: trading sex for  
644 help and increasing offspring heterozygosity. *Proc R Soc B Biol Sci* **274**:1895–1903.  
645 doi:10.1098/rspb.2007.0424
- 646 Rubenstein DR. 2006. The evolution of the social and mating systems of the plural cooperatively  
647 breeding superb starling, *Lamprotornis Superbus*. Cornell University.
- 648 Rubenstein DR. 2005. Isolation and characterization of polymorphic microsatellite loci in the  
649 plural cooperatively breeding superb starling, *Lamprotornis superbus*. *Mol Ecol Notes*  
650 **5**:739–744. doi:10.1111/j.1471-8286.2005.01049.x
- 651 Rubenstein DR, Abbot P. 2017. The evolution of social evolution In: Rubenstein DR, Abbot P,  
652 editors. *Comparative Social Evolution*. Cambridge University Press. pp. 1–18.  
653 doi:10.1017/9781107338319.002
- 654 Rubenstein DR, Lovette IJ. 2007. Temporal Environmental Variability Drives the Evolution of  
655 Cooperative Breeding in Birds. *Curr Biol* **17**:1414–1419. doi:10.1016/j.cub.2007.07.032
- 656 Rubenstein DR, Skolnik H, Berrio A, Frances A. 2016. Sex-specific fitness effects of  
657 unpredictable early life conditions are associated with DNA methylation in the avian  
658 glucocorticoid receptor. *Mol Ecol* **25**:1714–1728. doi:10.1111/mec.13483
- 659 Russell AF, Lummaa V. 2009. Maternal effects in cooperative breeders: From hymenopterans to  
660 humans. *Philos Trans R Soc B Biol Sci* **364**:1143–1167. doi:10.1098/rstb.2008.0298
- 661 Russell AF, Portelli DJ, Russell DJF, Barclay H. 2010. Breeding ecology of the Chestnut-  
662 crowned Babbler: A cooperative breeder in the desert. *Emu* **110**:324–331.  
663 doi:10.1071/MU10028
- 664 Saastamoinen M, Bocedi G, Cote J, Legrand D, Guillaume F, Wheat CW, Fronhofer EA, Garcia

- 665 C, Henry R, Husby A, Baguette M, Bonte D, Coulon A, Kokko H, Matthysen E, Niitepõld  
666 K, Nonaka E, Stevens VM, Travis JMJ, Donohue K, Bullock JM, del Mar Delgado M.  
667 2018. Genetics of dispersal. *Biol Rev* **93**:574–599. doi:10.1111/brv.12356
- 668 Schielzeth H. 2010. Simple means to improve the interpretability of regression coefficients.  
669 *Methods Ecol Evol* **1**:103–113. doi:10.1111/j.2041-210X.2010.00012.x
- 670 Silk JB, Brown GR. 2008. Local resource competition and local resource enhancement shape  
671 primate birth sex ratios. *Proc R Soc B Biol Sci* **275**:1761–1765. doi:10.1098/rspb.2008.0340
- 672 Sparkman AM, Adams JR, Steury TD, Waits LP, Murray DL. 2011. Direct fitness benefits of  
673 delayed dispersal in the cooperatively breeding red wolf (*Canis rufus*). *Behav Ecol* **22**:199–  
674 205. doi:10.1093/beheco/arq194
- 675 Stacey PB, Ligon JD. 1991. The Benefits-of-Philopatry Hypothesis for the Evolution of  
676 Cooperative Breeding: Variation in Territory Quality and Group Size Effects. *Am Nat*  
677 **137**:831–846. doi:10.1086/285196
- 678 Stearns SC. 1989. Trade-Offs in Life-History Evolution. *Funct Ecol* **3**:259–268.
- 679 Suh YH, Pesendorfer MB, Tringali A, Bowman R, Fitzpatrick JW. 2020. Investigating social and  
680 environmental predictors of natal dispersal in a cooperative breeding bird. *Behav Ecol*  
681 **31**:692–701. doi:10.1093/beheco/araa007
- 682 Taylor PD. 1992. Altruism in viscous populations - an inclusive fitness model. *Evol Ecol* **6**:352–  
683 356. doi:10.1007/BF02270971
- 684 Therneau T. 2020. A Package for Survival Analysis in R.
- 685 Tschirren B, Fitze PS, Richner H. 2007. Maternal modulation of natal dispersal in a passerine  
686 bird: An adaptive strategy to cope with parasitism? *Am Nat* **169**:87–93. doi:10.1086/509945
- 687 Van Petegem KHP, Pétilion J, Renault D, Wybouw N, Van Leeuwen T, Stoks R, Bonte D. 2015.

688 Empirically simulated spatial sorting points at fast epigenetic changes in dispersal  
689 behaviour. *Evol Ecol* **29**:299–310. doi:10.1007/s10682-015-9756-9

690 Veltman CJ. 2008. Flock, pair and group living lifestyles without cooperative breeding by  
691 Australian Magpies *Gymnorhina tibicen*. *Ibis* **131**:601–608. doi:10.1111/j.1474-  
692 919X.1989.tb04795.x

693 Walters JR, Doerr PD, Carter JH. 1992. Delayed dispersal and reproduction as a life-history  
694 tactic in cooperative breeders: fitness calculations from red-cockaded woodpeckers. *Am Nat*  
695 **139**:623–643. doi:10.1086/285347

696 Weinman LR, Solomon JW, Rubenstein DR. 2015. A comparison of single nucleotide  
697 polymorphism and microsatellite markers for analysis of parentage and kinship in a  
698 cooperatively breeding bird. *Mol Ecol Resour* **15**:502–511. doi:10.1111/1755-0998.12330

699 West Eberhard MJ. 1989. Phenotypic Plasticity and the Origins of Diversity. *Annu Rev Ecol Syst*  
700 **20**:249–278.

701 Wright J, McDonald PG, Te Marvelde L, Kazem AJN, Bishop CM. 2010. Helping effort  
702 increases with relatedness in bell miners, but “unrelated” helpers of both sexes still provide  
703 substantial care. *Proc R Soc B Biol Sci* **277**:437–445. doi:10.1098/rspb.2009.1360  
704



705 **Figures**

706

707

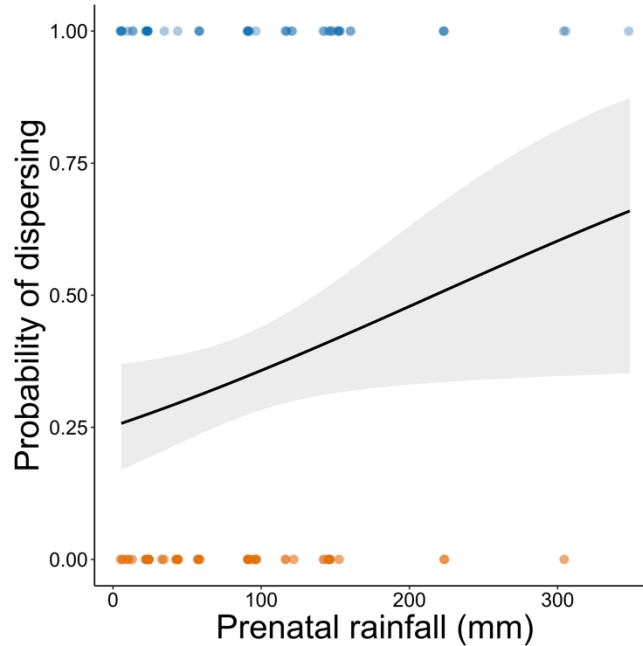

708

709

710 **Figure 1. Effect of prenatal rainfall on the probability of male superb starlings dispersing**

711 **from their natal groups.** Males were more likely to disperse when born following periods of

712 higher prenatal rainfall ( $N = 151$ ,  $P = 0.049$ ). Model estimate (solid line) is bounded by the 95%

713 confidence interval (shaded areas). Circles indicate raw data (blue = dispersed, orange =

714 remained).

715

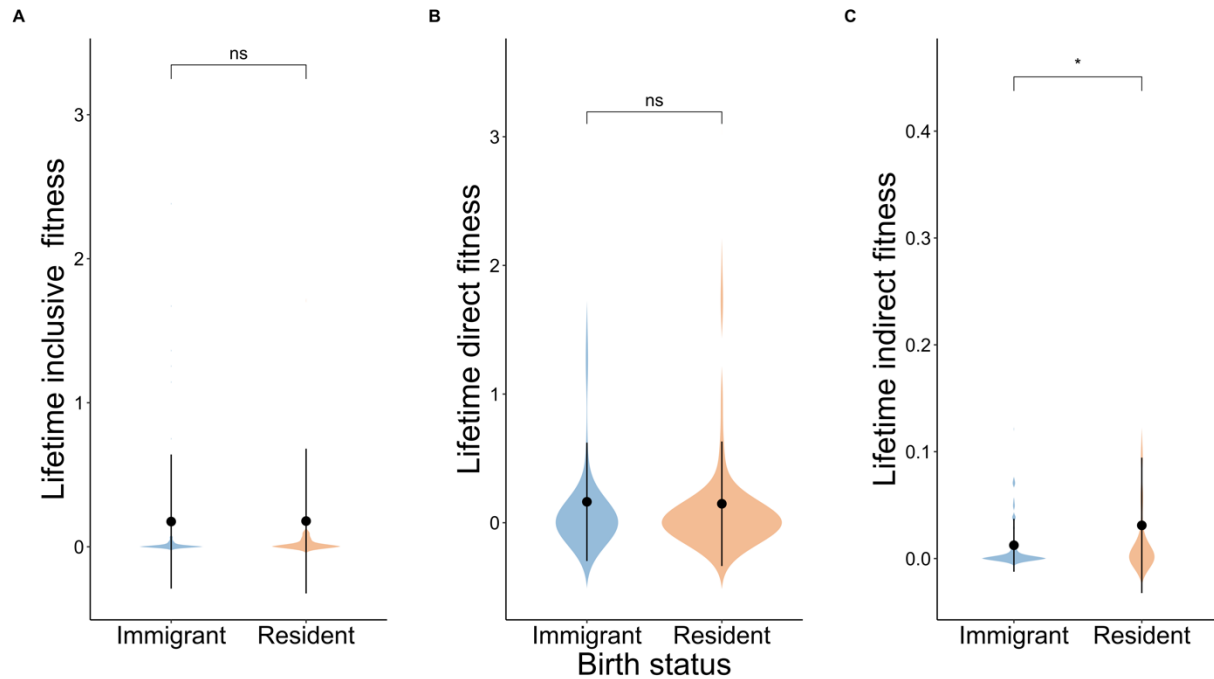

716

717

718 **Figure 2. Mean lifetime fitness of immigrant and resident male superb starlings.** Immigrant  
719 and resident males ( $N_{Imm} = 59$ ,  $N_{Res} = 103$ ) have equal lifetime (A) inclusive ( $P = 0.43$ ), and (B)  
720 direct ( $P = 0.66$ ) fitness, though residents have higher (C) indirect fitness ( $P = 0.05$ ). Black dots  
721 represent means and error bars denote standard deviation. Shaded areas are kernel probability  
722 densities illustrating the distribution of the data.

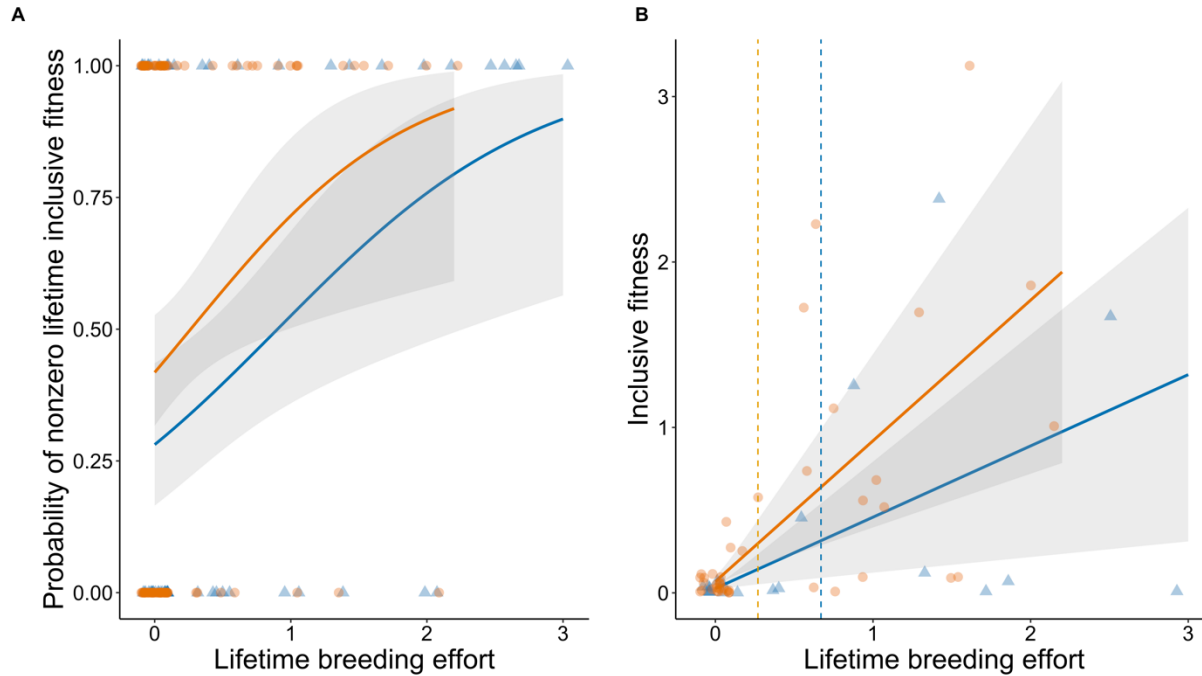

723

724 **Figure 3. Effect of reproductive tradeoffs on lifetime inclusive fitness of male superb**

725 **starlings.** The effect of lifetime breeding effort and birth status (immigrants = blue, triangles;

726 residents = orange, circles) on (A) the probability of accruing any nonzero lifetime inclusive

727 fitness ( $N = 161$ ), and (B) the value of nonzero lifetime inclusive fitness ( $N = 74$ ). For

728 visualization purposes, we excluded one individual with lifetime breeding effort greater than

729 three standard deviations above the mean; this individual was included in the statistical analysis,

730 though excluding it did not alter the results. Lifetime breeding effort (i.e., the number of

731 breeding attempts as a proportion of an individual's adult lifespan), but not birth status, affected

732 a male's likelihood of accruing some nonzero inclusive fitness during his lifetime ( $P < 0.001$ ).

733 However, among males with some lifetime inclusive fitness, residents accrued higher inclusive

734 fitness than immigrants for the same amount of lifetime breeding effort ( $P = 0.04$ ). Model

735 estimates (solid lines) are bound by 95% confidence intervals (shaded areas). Points indicate raw

736 data. Dashed vertical lines indicate mean lifetime breeding effort.

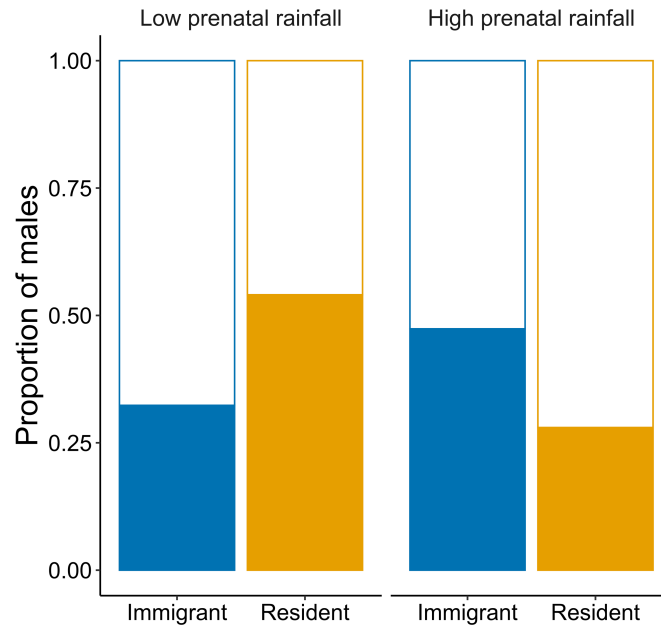

737

738 **Figure 4. Fitness consequences of male superb starlings adopting the tactic not predicted by**

739 **the prevailing prenatal environmental conditions.** The effect of prenatal rainfall and birth

740 status (immigrants = blue, residents = orange) on the probability of accruing any nonzero

741 lifetime inclusive fitness (fill = nonzero fitness, no fill = zero fitness) ( $N = 152$ ). Immigrants

742 were more likely to accrue nonzero lifetime inclusive fitness when born following periods of

743 high prenatal rainfall, whereas residents were more likely to accrue nonzero lifetime inclusive

744 fitness when born following periods of low prenatal rainfall ( $P = 0.03$ ).

745 **Table 1. Factors affecting dispersal decisions of natal males.** Model-averaged coefficients  
746 (full average) of best fit general linear models ( $AIC_c < 2$ ) with a binomial response (dispersed  
747 vs. remained) variable for natal males ( $N = 151$ ). Since pre- and postnatal sex ratio and group  
748 size are highly correlated, we only included the latter in the final full model.  
749

| Effect                  | Estimate | Std.<br>Error | Adjusted<br>Std.<br>Error | Z value | 95% CI      | p-value |
|-------------------------|----------|---------------|---------------------------|---------|-------------|---------|
| Intercept               | -0.63    | 0.17          | 0.18                      | 3.59    | -0.97 -0.28 | <0.001  |
| Prenatal rainfall       | 0.36     | 0.18          | 0.18                      | 1.97    | 0.002 0.72  | 0.049   |
| Postnatal sex ratio     | -0.02    | 0.09          | 0.09                      | 0.24    | -0.45 0.24  | 0.81    |
| Postnatal group<br>size | 0.02     | 0.08          | 0.08                      | 0.19    | -0.26 0.43  | 0.85    |
| Postnatal rainfall      | 0.01     | 0.09          | 0.09                      | 0.15    | -0.32 0.47  | 0.88    |

750

751 **Table 2. Effects of lifetime breeding effort and birth status on lifetime inclusive fitness of**  
752 **males.** Results of general linear models with a (A) binomial (zero vs. nonzero) ( $N = 162$ ) and  
753 (B) continuous, positive ( $N = 75$ ) response variable for lifetime inclusive fitness of males.

(A) Response variable: binomial (zero/nonzero) lifetime inclusive fitness

| <b>Effect</b>            | <b>Estimate</b> | <b>Std. Error</b> | <b>Z value</b> | <b>95% CI</b> |       | <b>p-value</b> |
|--------------------------|-----------------|-------------------|----------------|---------------|-------|----------------|
| Intercept                | -0.98           | 0.33              | -2.97          | -1.66         | -0.35 | 0.003          |
| Lifetime breeding effort | 1.12            | 0.30              | 3.72           | 0.58          | 1.77  | <0.001         |
| Birth status             | 0.67            | 0.37              | 1.82           | -0.04         | 1.42  | 0.07           |

(B) Response variable: continuous, positive lifetime inclusive fitness

| <b>Effect</b>            | <b>Estimate</b> | <b>Std. Error</b> | <b>t value</b> | <b>95% CI</b> |      | <b>p-value</b> |
|--------------------------|-----------------|-------------------|----------------|---------------|------|----------------|
| Intercept                | 0.03            | 0.01              | 2.45           | 0.01          | 0.06 | 0.02           |
| Lifetime breeding effort | 0.62            | 0.14              | 4.37           | 0.40          | 1.00 | <0.001         |
| Birth status             | 0.04            | 0.02              | 2.07           | -0.005        | 0.08 | 0.04           |

754

755 **Table 3. Effects of male superb starlings adopting the tactic not predicted by the prevailing**  
756 **prenatal ecological conditions on the likelihood of gaining nonzero inclusive fitness during**  
757 **their lifetimes.** Results of a general linear model with a binomial response (zero vs. nonzero  
758 lifetime inclusive fitness) variable for males ( $N = 152$ ). Since including breeding season and  
759 social group as random effects led to singular model fits, they were excluded from the full  
760 model.

761

| Effect                                          | Estimate | Std. Error | Z value | 95% CI |       | p-value |
|-------------------------------------------------|----------|------------|---------|--------|-------|---------|
| Intercept                                       | -0.74    | 0.36       | -2.01   | -1.50  | -0.04 | 0.04    |
| Categorical prenatal rainfall                   | 0.63     | 0.59       | 1.08    | -0.52  | 1.80  | 0.28    |
| Birth status                                    | 0.90     | 0.43       | 2.07    | 0.06   | 1.78  | 0.04    |
| Categorical prenatal rainfall x<br>Birth status | -1.74    | 0.77       | -2.25   | -3.29  | -0.24 | 0.02    |

762

## **Supplementary Information for**

Prenatal environmental variation, alternative reproductive tactics and the formation of a mixed-kin cooperative society

Shailee S. Shah and Dustin R. Rubenstein

Shailee S. Shah

**Email:** [shailee.shah@columbia.edu](mailto:shailee.shah@columbia.edu)

### **This PDF file includes:**

Supplementary Information Text

Figures S1 to S4

Table S1 to S2

SI References



## Supplementary Information Text

**Methods.** We inferred age of dispersal of males indirectly using four lines of evidence: (i) the modal age at which males disappear from their natal group ( $N = 155$ ); (ii) the categorical age of immigrant males dispersing into the study population ( $< 1$  year of age or  $\geq 1$  year of age) ( $N = 97$ ); (iii) the likelihood of males being detected in the census in their first year of life ( $N = 103$ ); and (iv) the minimum age of first breeding by resident males ( $N = 29$ ). We found that (i) 33% of natal males disappeared within the first six months of hatching (Fig. S2A). If six months is the modal age of dispersal, most immigrants into the study population should be in juvenile or sub-adult ( $< 1$  year of age) plumage. However, (ii) 90% of male immigrants into the study population were in adult plumage (i.e.,  $\geq 1$  year of age) (Fig. S2B). Thus, we reasoned that natal males disperse at 1 year of age but the majority of them are likely missed in the census during the one breeding season they spend in their natal group before they disperse, largely because of our methods for performing censuses. Since our census effort is mostly opportunistic, it is common for individuals to be missed for multiple breeding seasons before being seen again, especially if they did not breed or act as an alloparent (Guindre-Parker and Rubenstein, 2020). We found that (iii) of all the males that remained in their natal group past 1 year of age, 64% were missed in the census at age 0.5 years (six months). Further, the likelihood of missing individuals was higher in the period preceding the short breeding seasons (70%) than in the period preceding the long breeding seasons (48%), which directly matches the variation in census effort. Finally, when we set age of dispersal as 1 year, 52 of 155 natal males (34%) were classified as “dispersed” in our dataset, a proportion that closely matches the proportion of male immigrants in the study population (see *Results*) and gives us more confidence in our inference of dispersal age. Moreover, (iv) the minimum age of first breeding by resident males was at one and a half years

old, further suggesting that males are reproductively immature in their first year of life and may thus disperse at around one year of age. While we cannot confirm that males dispersed, not died, the increased likelihood of dispersal following benign prenatal conditions (see *Results*) suggests that these males did indeed disperse, since mortality would be higher following harsher conditions.

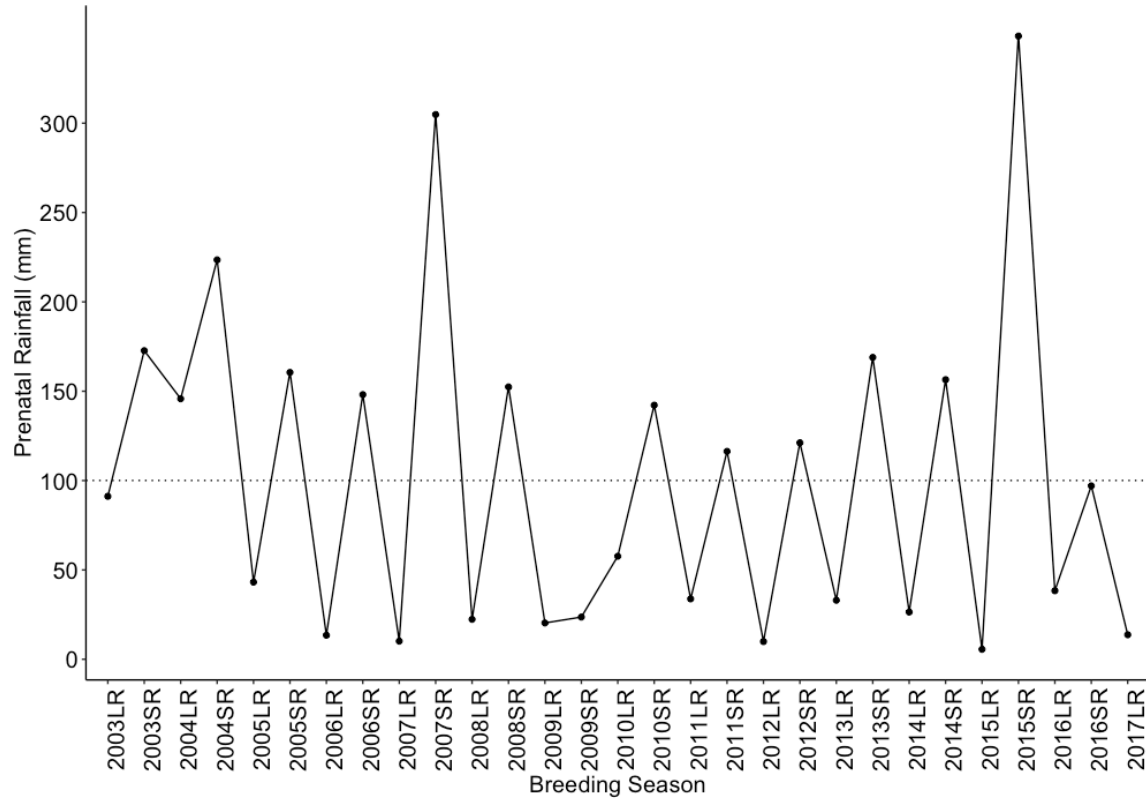

**Figure S1. Variation in prenatal rainfall during the study period.** Superb starlings in the study population breed twice a year in the long (LR) and short (SR) breeding seasons. Dotted line indicates the mean level of prenatal rainfall during the study period.

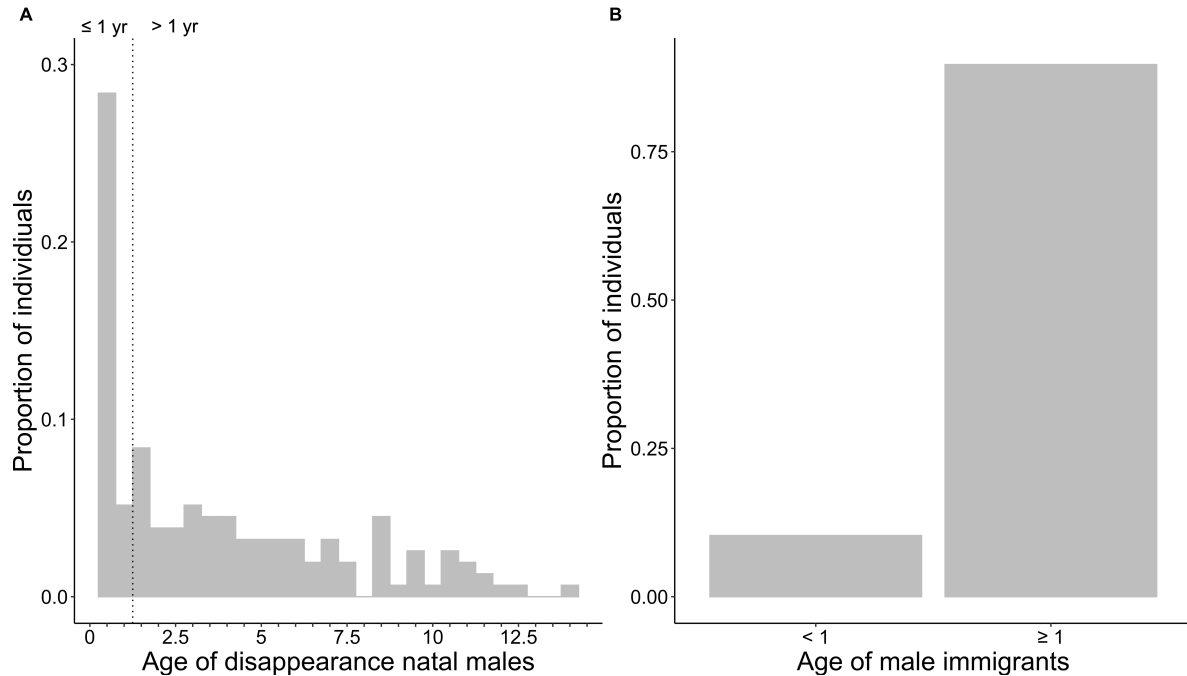

**Figure S2. Evidence for age of dispersal of male superb starlings.** (A) The modal age of disappearance of natal males is six months ( $N = 155$ ). Age is in 0.5-year (six month) increments. However, (B) the majority of immigrant males are caught in adult plumage ( $\geq 1$  year of age) ( $N = 97$ ). Thus, we concluded that males disperse at 1 year of age and are likely missed in the census during the one breeding season they spend in their natal group before dispersing.

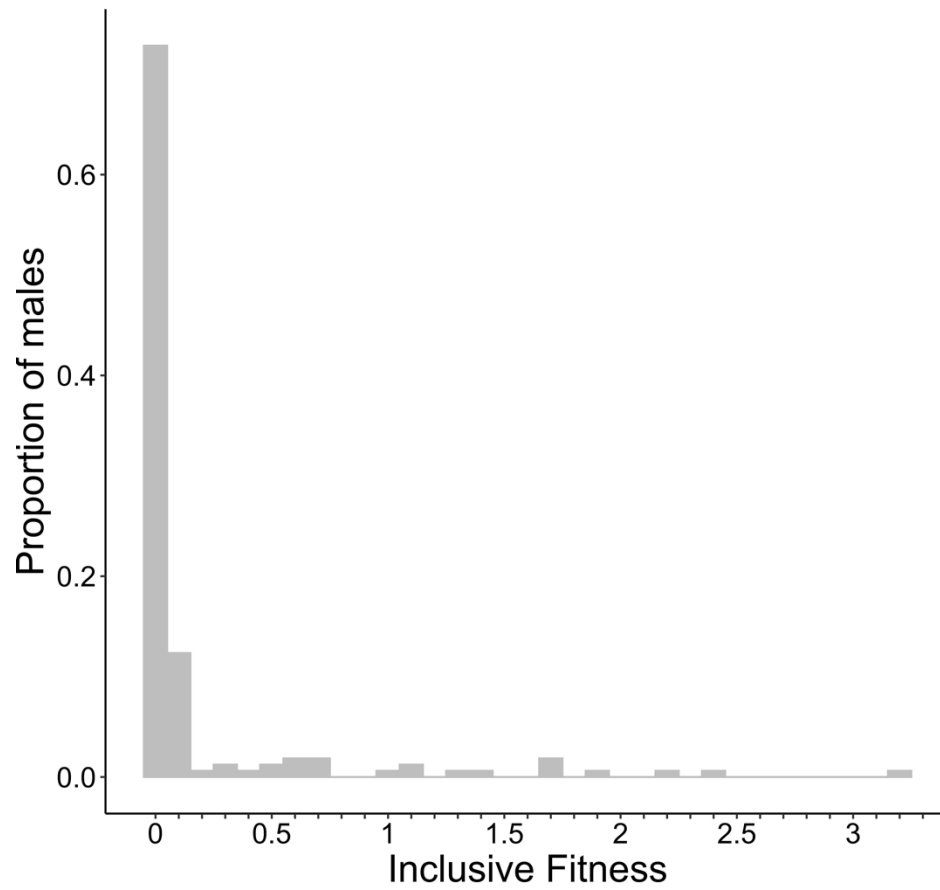

**Figure S3.** Lifetime inclusive fitness of male superb starlings. Histogram shows the distribution of lifetime inclusive fitness of males ( $N = 162$ ).

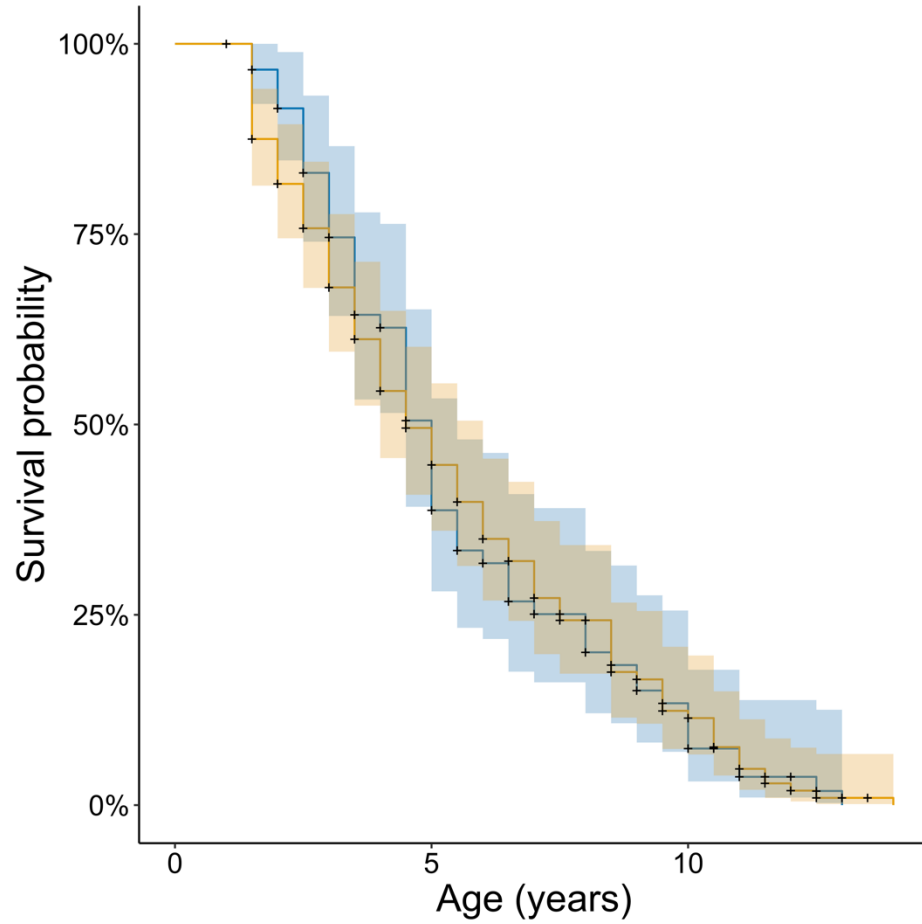

**Figure S4.** Survivorship of resident and immigrant male superb starlings. Male survival did not differ by birth status (immigrants = blue, residents = orange) ( $N_{Imm} = 59$ ,  $N_{Res} = 103$ ,  $P = 0.97$ ). Model estimates (solid lines) are bound by 95% confidence intervals.

**Table S1. Model ranking for factors affecting dispersal decision of natal males using an information theoretic approach.** “x” indicates predictors used as fixed effects in the model.

Since pre- and postnatal group size and sex ratio were highly correlated, we only included the latter in the full model. Since including breeding season and social group as random effects led to singular model fits, they were excluded from the full model. Models are ranked by AICc score (Akaike Information Criterion corrected for small sample sizes) and arranged in order from best to worst fit.

| <b>Model</b> | <b>Intercept</b> | <b>Postnatal<br/>group size</b> | <b>Prenatal<br/>rainfall</b> | <b>Postnatal<br/>Rainfall</b> | <b>Postnatal<br/>sex ratio</b> | <b>df</b> | <b>ΔAICc</b> |
|--------------|------------------|---------------------------------|------------------------------|-------------------------------|--------------------------------|-----------|--------------|
| m3           | x                |                                 | x                            |                               |                                | 2         | 0.00         |
| m11          | x                |                                 | x                            |                               | x                              | 3         | 1.69         |
| m4           | x                | x                               | x                            |                               |                                | 3         | 1.84         |
| m7           | x                |                                 | x                            | x                             |                                | 3         | 1.94         |
| m1           | x                |                                 |                              |                               |                                | 1         | 2.36         |
| m5           | x                |                                 |                              | x                             |                                | 2         | 2.82         |
| m12          | x                | x                               | x                            |                               | x                              | 4         | 3.37         |
| m15          | x                |                                 | x                            | x                             | x                              | 4         | 3.68         |
| m8           | x                | x                               | x                            | x                             |                                | 4         | 3.70         |
| m9           | x                |                                 |                              |                               | x                              | 2         | 3.72         |
| m2           | x                | x                               |                              |                               |                                | 2         | 4.20         |
| m6           | x                | x                               |                              | x                             |                                | 3         | 4.34         |
| m13          | x                |                                 |                              | x                             | x                              | 3         | 4.37         |
| m16          | x                | x                               | x                            | x                             | x                              | 5         | 5.26         |
| m10          | x                | x                               |                              |                               | x                              | 3         | 5.34         |
| m14          | x                | x                               |                              | x                             | x                              | 4         | 5.61         |

**Table S2. Correlation in rainfall between sites within dispersal radius of the study site.**

Numbers represent  $R^2$  values of correlation of monthly rainfall (2008-2017;  $N = 103$ ) between three sites within the approximate dispersal radius of the study site, Mpala Research Centre (MRC); UHURU Central (12 km), UHURU North (20 km), and Nanyuki (38 km).

|                      | <b>MRC</b> | <b>UHURU Central</b> | <b>UHURU North</b> | <b>Nanyuki</b> |
|----------------------|------------|----------------------|--------------------|----------------|
| <b>MRC</b>           | -          | -                    | -                  | -              |
| <b>UHURU Central</b> | 0.85       | -                    | -                  | -              |
| <b>UHURU North</b>   | 0.82       | 0.87                 | -                  | -              |
| <b>Nanyuki</b>       | 0.78       | 0.73                 | 0.70               | -              |



## SI References

Guindre-Parker S, Rubenstein DR. 2020. Survival benefits of group living in a fluctuating environment. *Am Nat* **195**:1027–1036. doi:10.1086/708496
